# Supplementary material for: Intermittent Use of a Short-Course Glucagon-like Peptide-1 Receptor Agonist Therapy Limits Adverse Cardiac Remodeling via Parkin-dependent Mitochondrial Turnover
Source: PubMed Central journal article supplement (PMC7237417; doi:10.1038/s41598-020-64924-2), 2020-05-19

# Intermittent Use of a Short-Course Glucagon-like Peptide-1 Receptor Agonist Therapy Limits Adverse Cardiac Remodeling via Parkin-dependent Mitochondrial Turnover

Juliana de F. Germano, Ph.D.<sup>#,1</sup>, Chengqun Huang, Ph.D.<sup>#,1</sup>, Jon Sin, Ph.D.<sup>1</sup>, Yang Song, Ph.D.<sup>1</sup>, Kyle C. Tucker, B.S.<sup>1</sup>, David J.R. Taylor, Ph.D.<sup>1</sup>, Hannaneh Saadaeijahromi, M.D.<sup>1</sup>, Aleksandr Stotland, Ph.D.<sup>1</sup>, Honit Piplani, Ph.D.<sup>1</sup>, Roberta A. Gottlieb, M.D.<sup>1</sup>, Robert M. Mentzer, Jr., M.D.<sup>1</sup>, and Allen M. Andres, Ph.D.<sup>\*,1,2</sup>

<sup>#</sup>These authors contributed equally

<sup>\*</sup>Corresponding Author

<sup>1</sup> Cedars Sinai Medical Center, Smidt Heart Institute

<sup>2</sup> University of California, San Diego, Department of Medicine

## Supplementary Figure Legends

**Supplementary Figure S1. Body parameters of wild-type mice.** Age-matched wild-type (WT) mice underwent PCAL and 2 hours later were given vehicle (50 $\mu$ L DMSO) or DMB (10pmoles/25g) i.p. then three times a week for two weeks (total 6 doses). Mice were sacrificed on day 28 post-MI. (n=7-8 mice/group). **(a)** Mouse weights were recorded on days 0, 3, 7, 14 and 28 and compared between groups; **(b)** Heart weights and tibia length were recorded on day 28 post-MI and heart weight/tibia length ratio were compared between groups; **(c)** Comparison of wet/dry lung ratios; **(d)** Representative images of hearts of vehicle and DMB-treated mice 28 days post-MI; **(e)** Glucose levels of naïve versus WT mice after 3 days of PCAL and treatment with either vehicle or DMB.

**Supplementary Figure S2. DMB stimulates fragmentation of mitochondria and decreases mitochondrial membrane potential.** **(a)** Mitochondrial membrane potential was measured with JC-1 ratiometric staining at indicated times after treatment with 1 $\mu$ M DMB. FCCP was used as a positive control to dissipate mitochondrial membrane potential. (n = 18-20 wells/group; n = 4 wells for positive control FCCP group). ANOVA with Tukey posthoc test was used to compare the groups. \*DMB *versus* Vehicle; #FCCP *versus* all groups. **(b)** Differentiated H9C2 cells were treated with 1 $\mu$ M DMB for 24 hours and then fixed with 4% PFA. Cells were subsequently immunostained with antibody to TOM70 (green) to highlight mitochondrial structure.

**Supplementary Figure S3. Original blots from Figure 2.** Age-matched wild-type (WT) mice received vehicle (50 $\mu$ L DMSO) or DMB (10pmoles/25g) i.p.. 1h later, mice received chloroquine (CQ, 10mg/kg i.p.) and were sacrificed 16h later (n = 3/group) for western blot analysis of autophagy and mitophagy markers. Western blot analysis and quantification of autophagy markers p62 **(a)**, LC3-I and -II **(b)** were done in heart whole lysates of WT mice and normalized to the respective Ponceau **(c)**; Western blot analysis and quantification of mitophagy markers Optineurin (OPTN) **(d)**, PINK1 **(e)** and BNIP3 **(f)** in the mitochondrial-enriched fraction of WT mice, with the respective Ponceau **(g)**. Blots were developed with Clarity Western ECL Substrate (Bio-Rad) and imaged using a ChemiDoc XRS and the Image Lab software v 5.0 (Bio-Rad). **Original blots from Figure 3.** Differentiated H9C2 cells were treated with vehicle (DMSO) or 1 $\mu$ M DMB overnight with or without autophagy inhibitor bafilomycin A1 (BafA1, 50nM). Western blot analysis of autophagy markers p62 **(h)**, Beclin-1 **(i)**, APG5 **(j)** and LC3-I and LC3-II **(k)** were performed in the cell whole lysate and normalized to the respective ponceau **(l)** (n = 3 plates/group); **(m,n)** Western blot analysis of p62 in the mitochondria-enriched subcellular fraction of DMSO or DMB-treated cells with or without BafA1 (n = 4 plates/group); **(o,p)** Ponceau from **(m)** and **(n)**, respectively. Blots were developed with Clarity Western ECL Substrate (Bio-Rad) and imaged using a ChemiDoc XRS and the Image Lab software v 5.0 (Bio-Rad). **Original blots from Figure 4.** Age-matched Parkin Knockout (PKO) were treated and sacrificed as the WT mice (described above). Western blot analysis of autophagy markers p62 **(q)** and LC3-I and -II **(r)** were done in heart whole lysates of WT mice and normalized to the respective ponceau **(s)**; Western blot analysis of mitophagy markers BNIP3 **(t)**, Optineurin (OPTN) **(u)** and PINK1 **(v)** in the mitochondrial-enriched fraction of PKO mice, with the respective ponceau **(w)**. Blots were developed with Clarity Western ECL Substrate (Bio-Rad) and imaged using a ChemiDoc XRS and the Image Lab software v 5.0 (Bio-Rad).

## Supplementary Methods

**Glucose level determination in serum:** Whole blood was harvested following mouse sacrifice and heart excision. Samples were at room temperature for 20 minutes then followed centrifugation at 2500 x g for 5 minutes. The serum samples were placed in new tubes and stored at -80°C until use. Glucose levels were assessed using the Autokit Glucose Kit (Wako Diagnostics) following the manufacturer protocol and determined by colorimetric measurement on a SpectraMax M2<sup>e</sup>.

**Immunofluorescence and Microscopy:** H9C2 cells were seeded on fibronectin gelatin coated glass bottom microwell dishes (MatTek Corporation) at a density of  $2.5 \times 10^3$  cells per well, then switched to differentiation media and maintained for five days. Differentiated H9C2 cells were treated with vehicle (DMSO, 0.1% vol) or 1  $\mu$ M DMB for 24 hours then fixed with 4% paraformaldehyde (Sigma-Aldrich) in phosphate-buffered saline for 10-15 min at room temperature and washed with PBS. Nuclei were stained with Hoechst 33342 (Invitrogen) and rinsed with PBS. Cells were permeabilized with PBS containing 5% horse serum, 5% goat serum and 0.3% Triton X-100, washed once with PBS and twice with Tris-buffered saline (TBS). Cells were incubated with primary antibodies to TOM70 (1:200, Proteintech) to immuno label mitochondria. After rinsing cells three times in TBS, cells were incubated in corresponding fluorescent secondary antibodies (1:1000, Invitrogen) for 2 hours in the dark at room temperature, then washed with PBS and stored at 4°C. Imaging was performed using a Keyence BZ-9000 microscope (Keyence; Osaka, Japan).

**Mitochondrial Membrane Potential Assay:** Mitochondrial membrane potential was assessed in differentiated H9C2 cardiomyocytes using JC-1 according to manufacturer's instructions. Briefly cells were grown and differentiated on opaque-walled tissue culture-treated 96-well plates with vehicle (DMSO) or 1 $\mu$ M DMB for up to 24 hours. Cells were then stained with 5 $\mu$ M JC-1 in complete differentiation medium at 37°C for 30 min. Cells were rinsed three times with PBS, then imaged immediately using a Spectramax M2 fluorescence plate reader. Membrane potential was expressed as the ratio of red (Ex/Em=540/590nm) to green (Ex/Em= 485/535nm) fluorescence. Negative control cells received 10 $\mu$ M FCCP for 10 minutes before JC-1 addition.

# Supplemental Figure S1

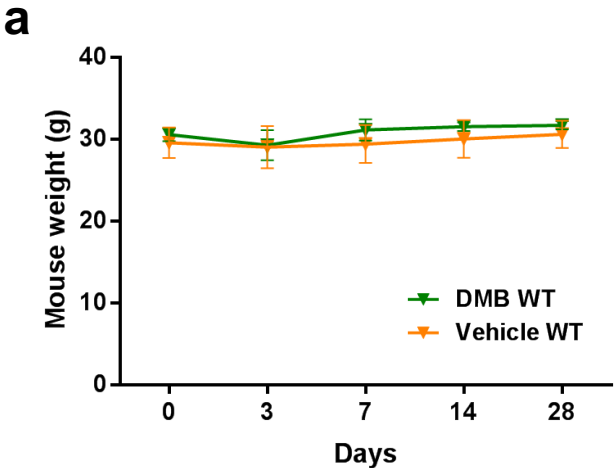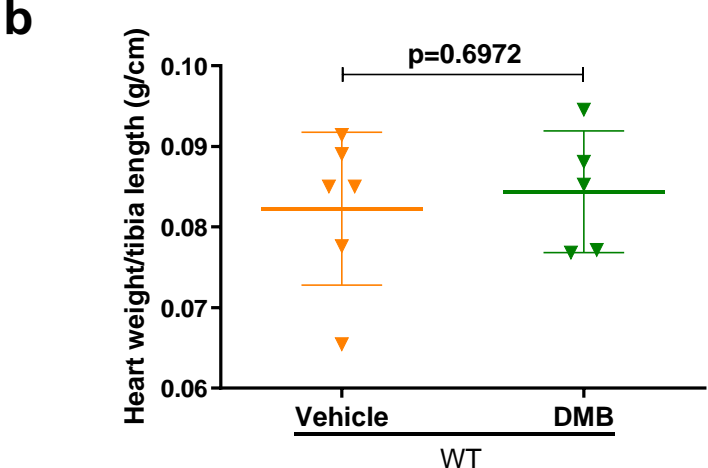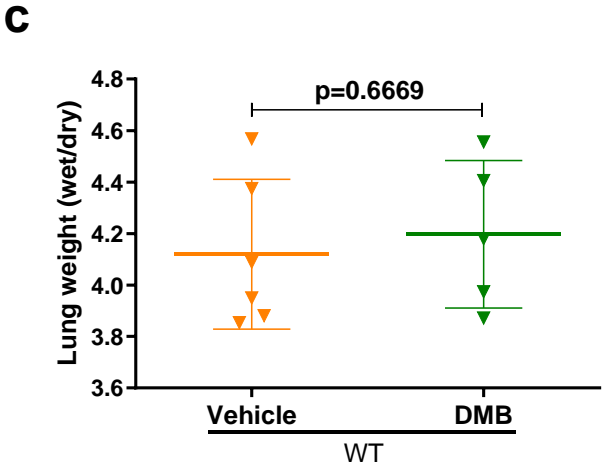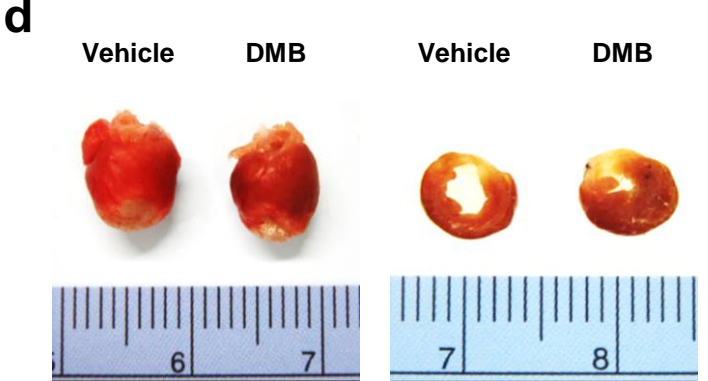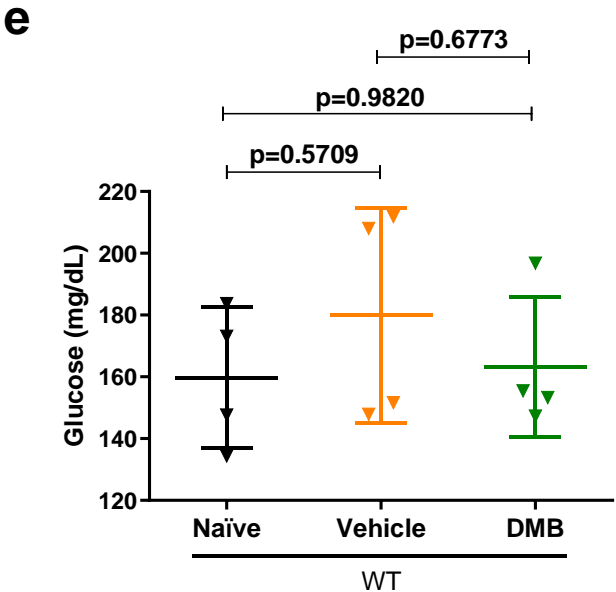

# Supplemental Figure S2

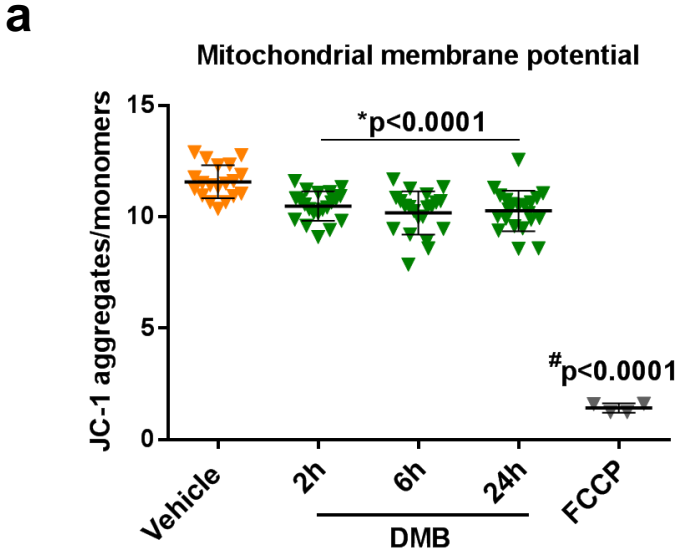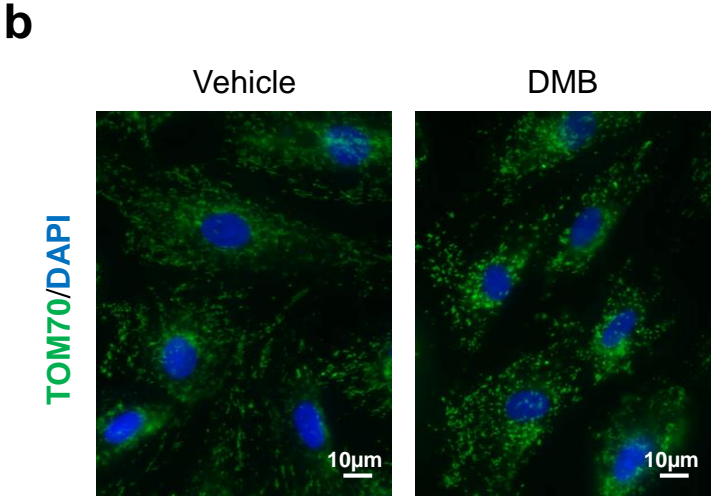

# Supplementary Figure 3

## Wild-type mice

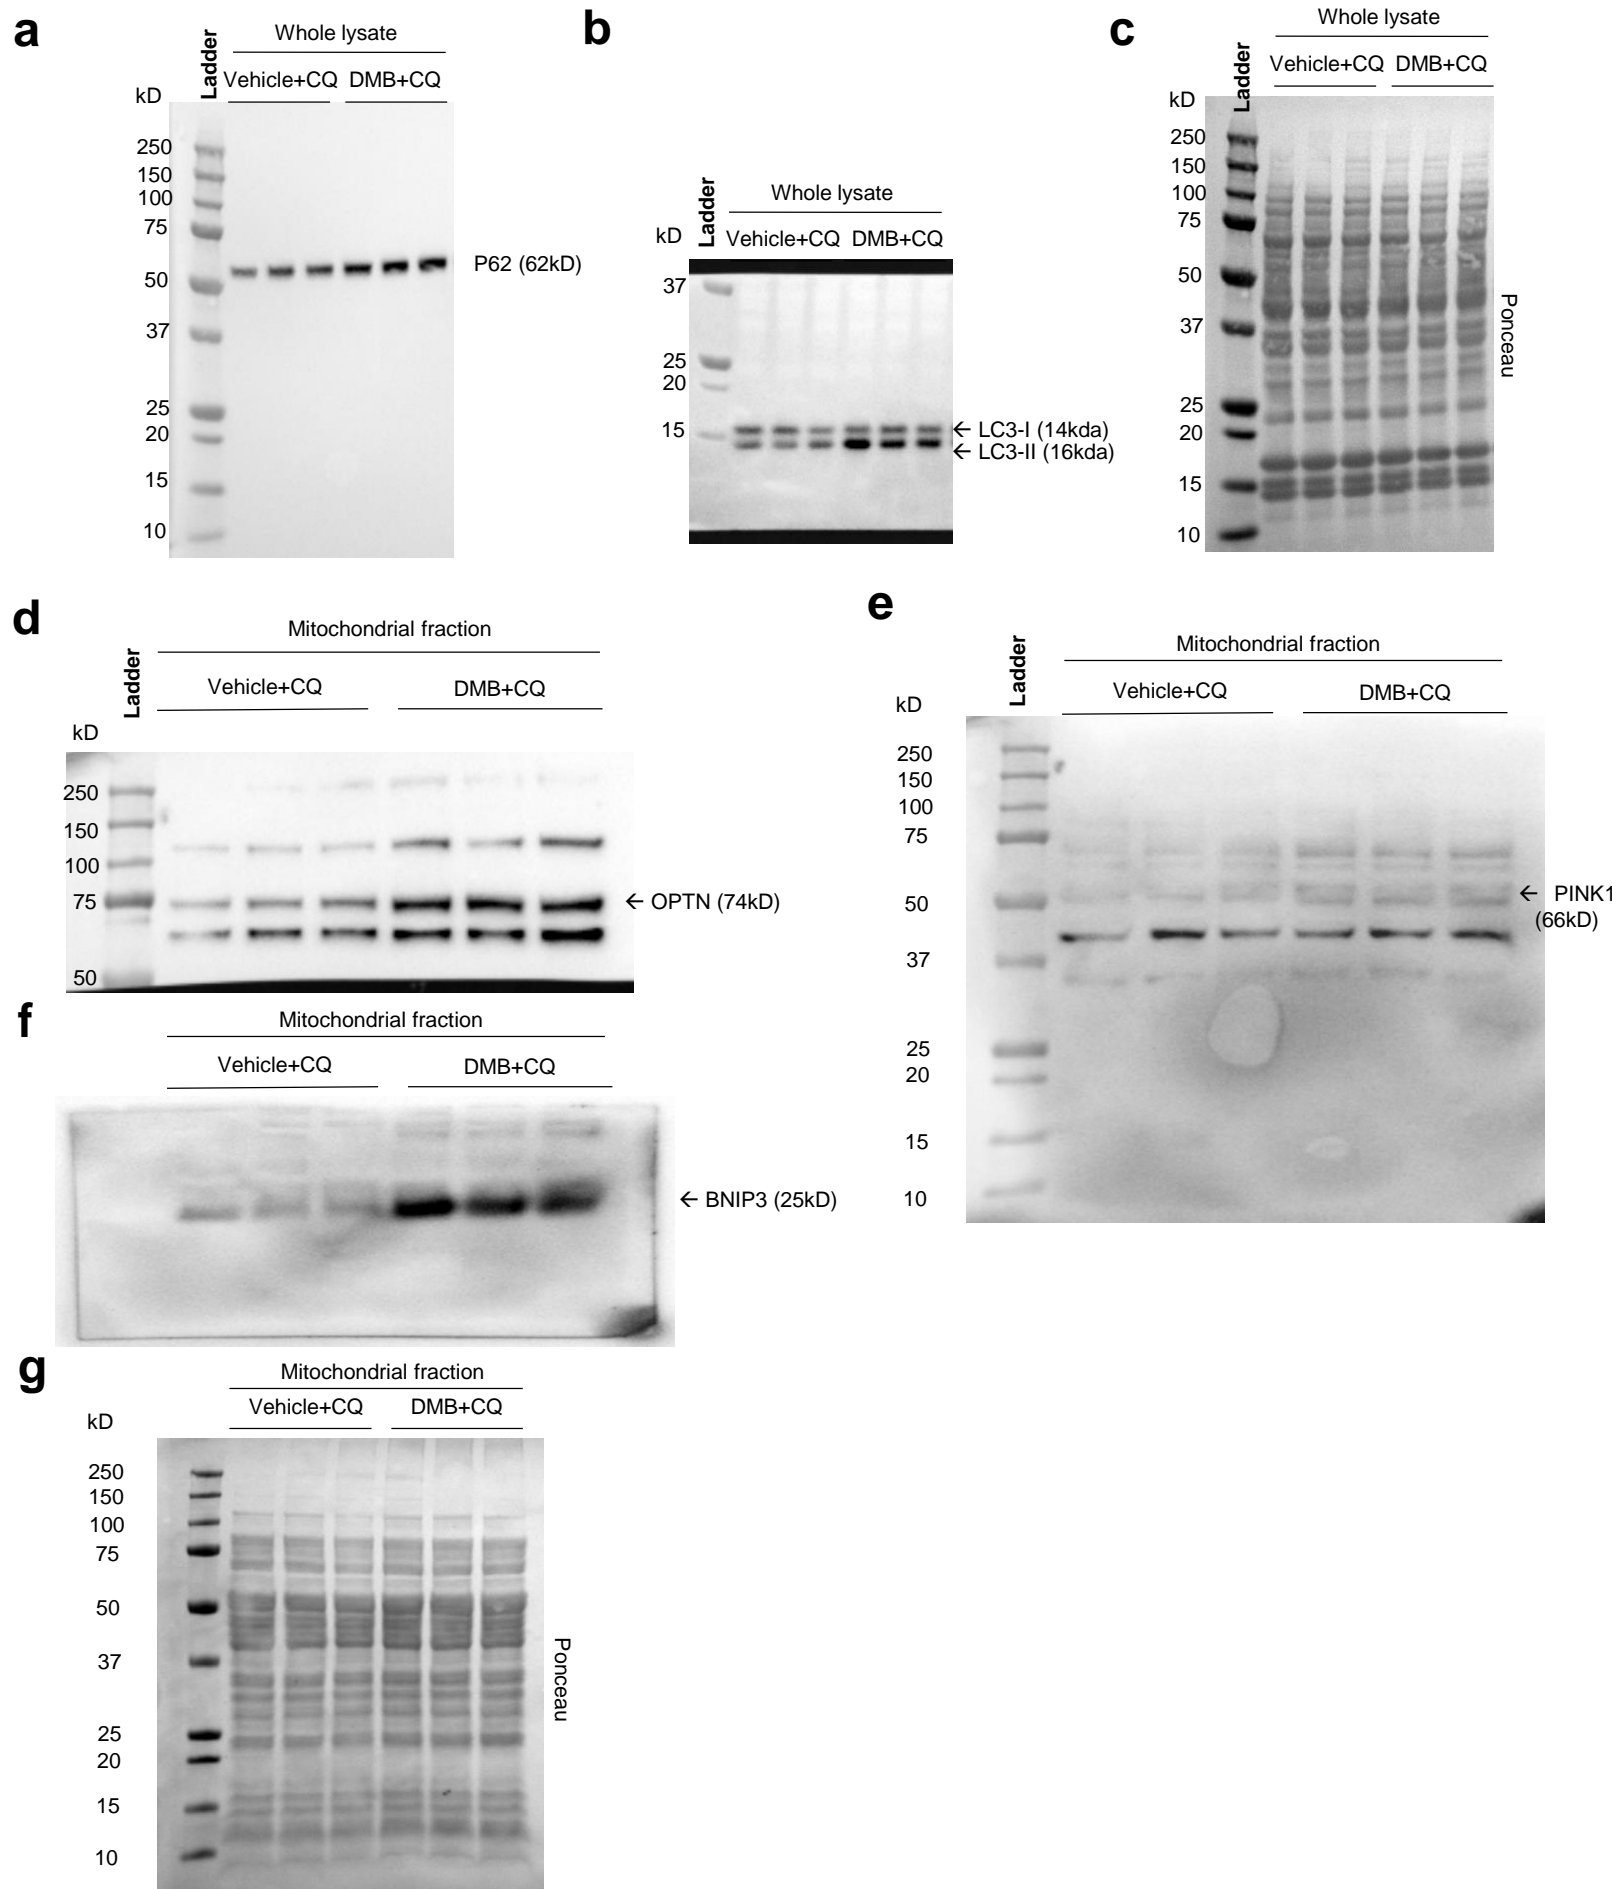

# Differentiated H9C2 cells

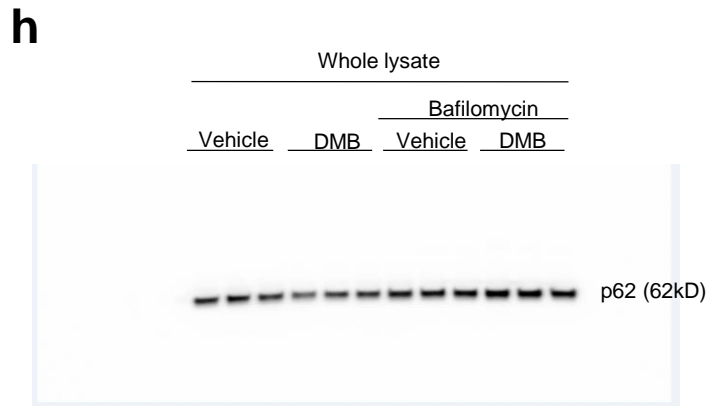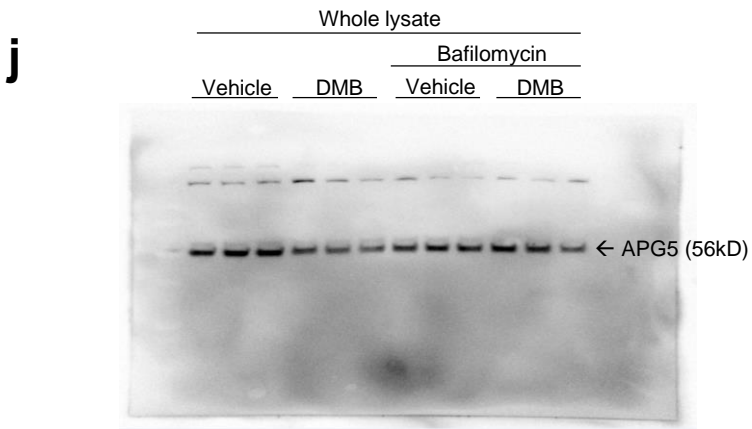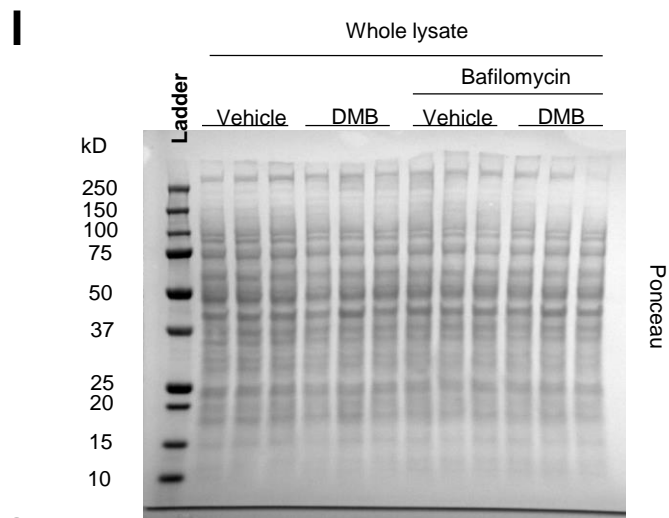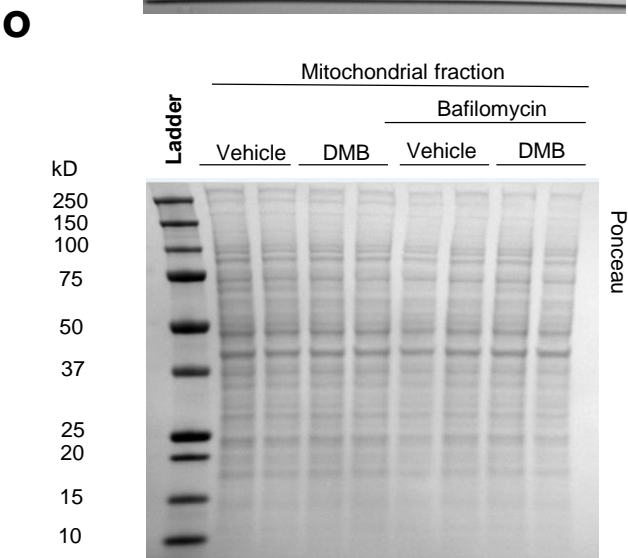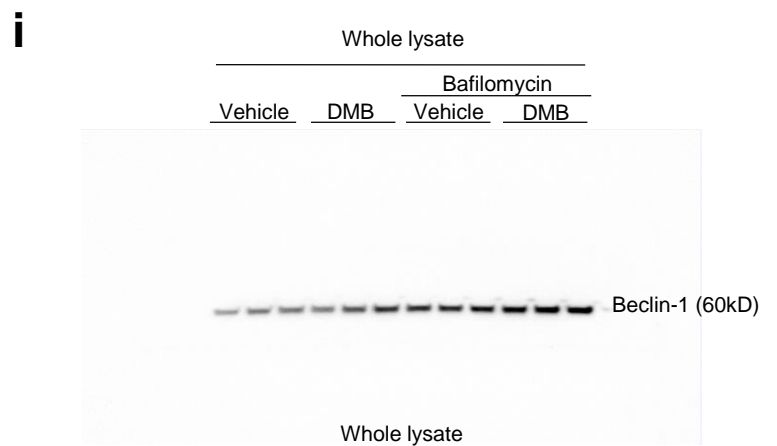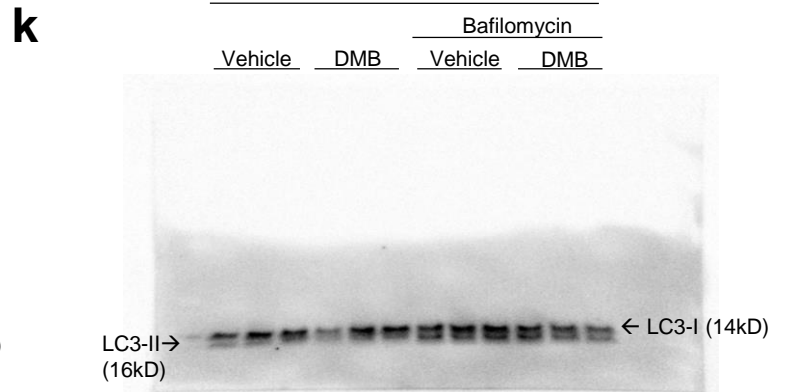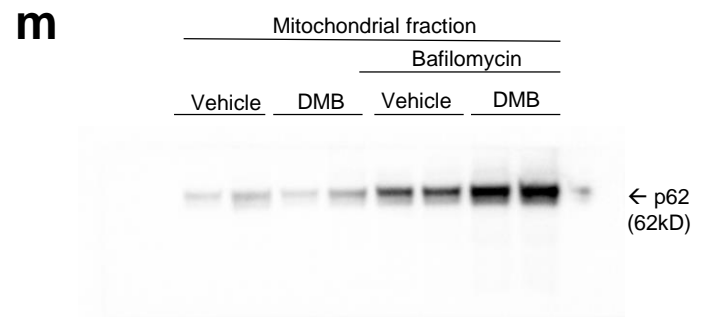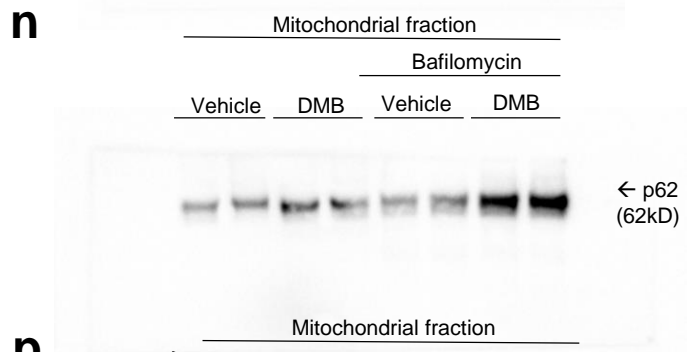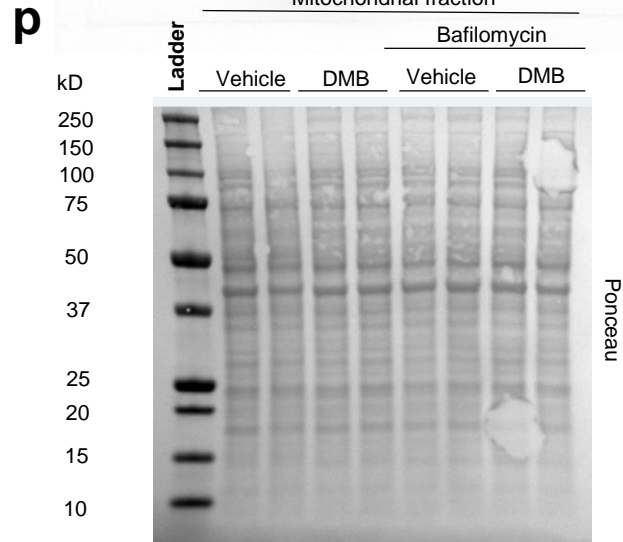

# Parkin knockout mice

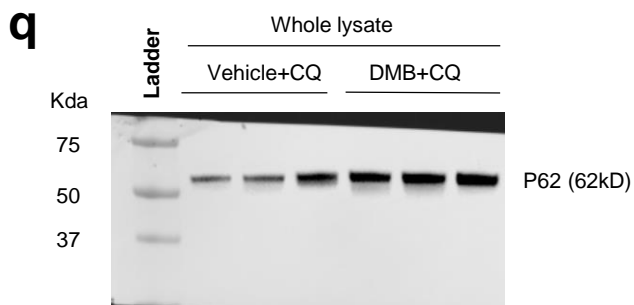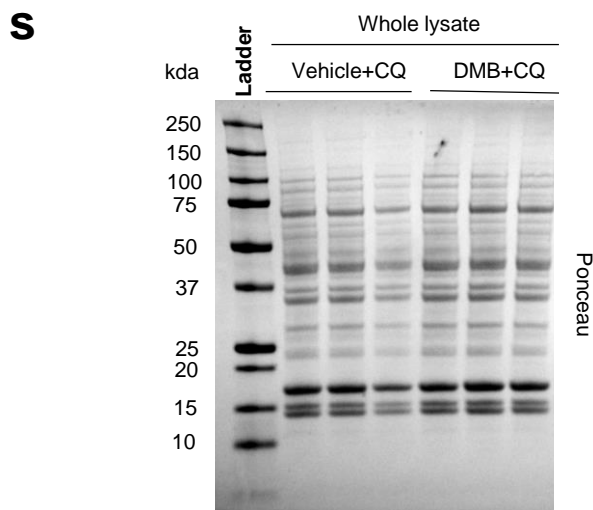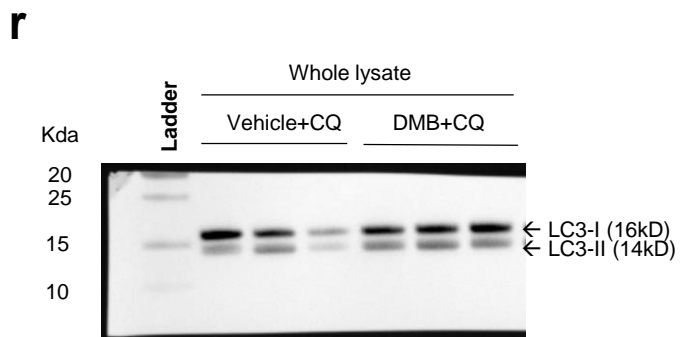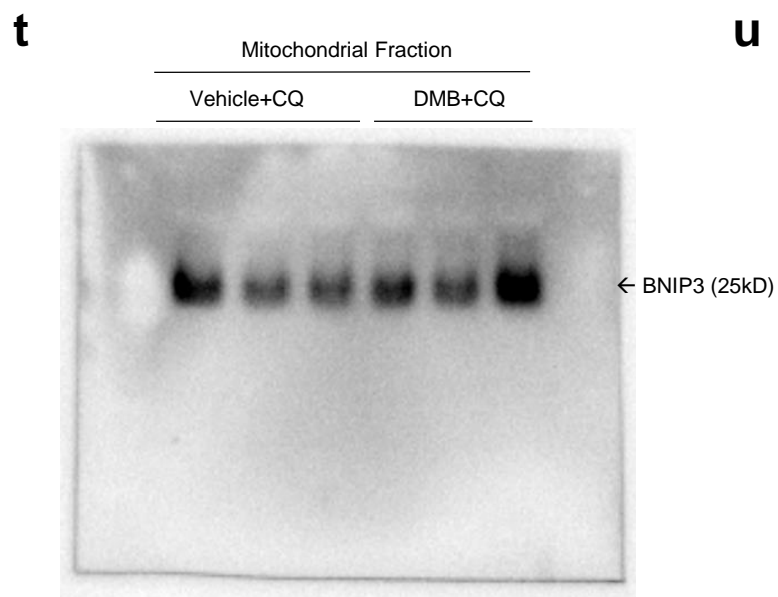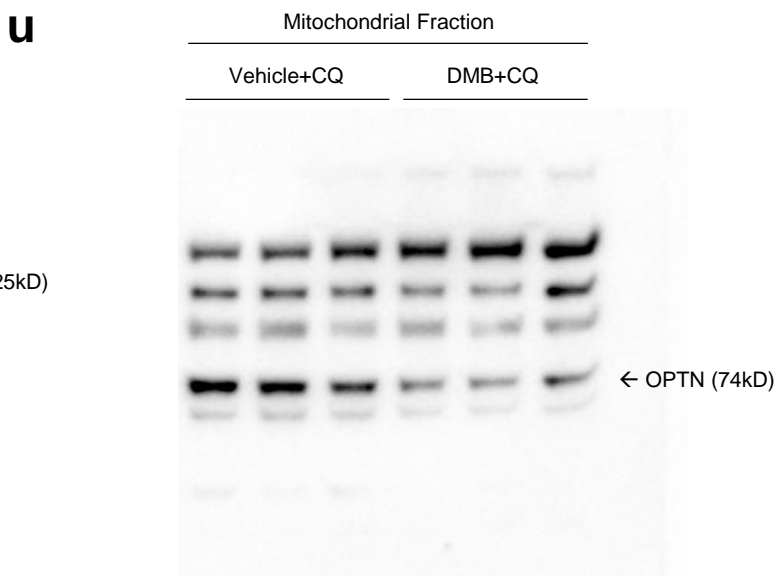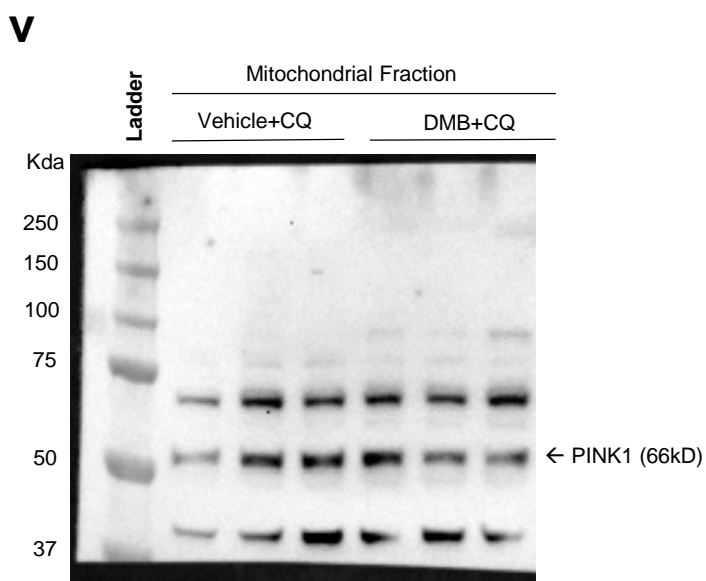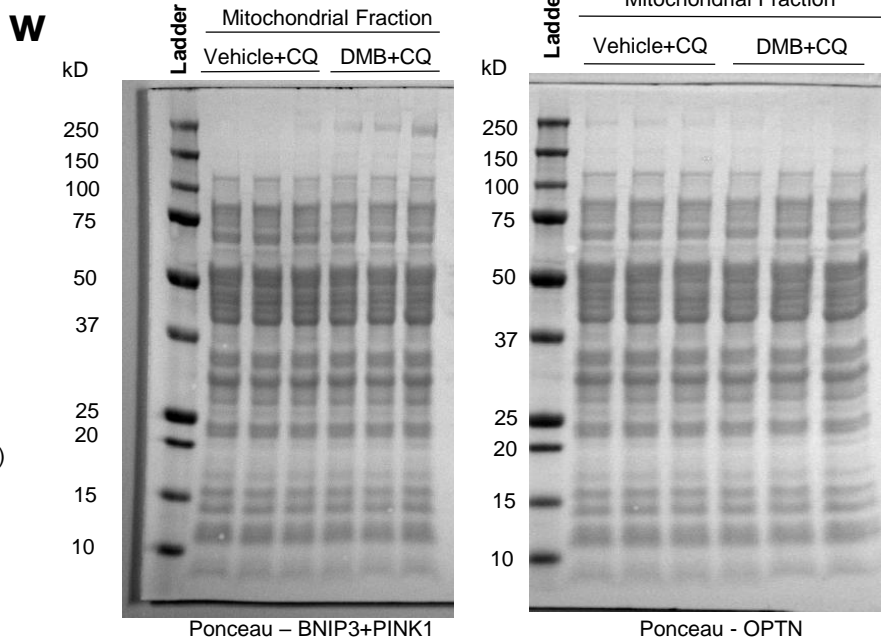

Supplement: 41598_2020_64924_MOESM1_ESM.pdf [file 41598_2020_64924_MOESM1_ESM.pdf]
